# Supplementary material for: Comparison of peripherally inserted central catheters (PICCs) versus totally implantable venous-access ports in pediatric oncology patients, a single center study
Source: Sci Rep. 2022 Mar 3;12:3510. doi: 10.1038/s41598-022-07584-8 (PMC8894364; doi:10.1038/s41598-022-07584-8)
Supplement: Supplementary file 1 — Supplementary Information. [file 41598_2022_7584_MOESM1_ESM.pdf]

Dear family members,

Section:                      number:                      time:

- Clear () basically clear () not clear ()

- Clear () basically clear () not clear ()

- Yes ( ) No ( )

- Clear () basically clear () not clear ()

- Yes ( ) No()

- Satisfied ( ) Basically satisfied ( ) Not satisfied ( )

- Satisfied ( ) Basically satisfied ( ) Not satisfied ( )

- Can () basic can () cannot ()

- Satisfied ( ) Basically satisfied ( ) Not satisfied ( )

- Satisfied ( ) Basically satisfied ( ) Not satisfied ( )

- Reasonable ( ) unreasonable ( )

- Satisfied ( ) Basically satisfied ( ) Not satisfied ( )
